# Supplementary material for: A Multi-Matrix Metabolomic Approach in Ringed Seals and Beluga Whales to Evaluate Contaminant and Climate-Related Stressors
Source: MDPI journal article supplement (doi:10.3390/metabo12090813), 2022-08-29
Supplement: s1 [file s1]

Article

# A Multi-Matrix Metabolomic Approach in Ringed Seals and Beluga Whales to Evaluate Contaminant and Climate-Related Stressors

Antoine É. Simond <sup>1,2</sup>, Marie Noël <sup>3</sup>, Lisa Loseto <sup>4,5</sup>, Magali Houde <sup>6</sup>, Jane Kirk <sup>7</sup>, Ashley Elliott <sup>4</sup> and Tanya M. Brown <sup>1,2\*</sup>

<sup>1</sup> Pacific Science Enterprise Centre, Fisheries and Oceans Canada, 4160 Marine Drive, West Vancouver, BC V7V 1N6, Canada

<sup>2</sup> School of Resource and Environmental Management, Simon Fraser University, 4160 Marine Drive, West Vancouver, BC V7V 1N6, Canada

<sup>3</sup> Ocean Wise, 101-440 Cambie Street, Vancouver, BC V6B 2N5, Canada

<sup>4</sup> Freshwater Institute, Fisheries and Oceans Canada, 501 University Crescent, Winnipeg, MB R3T 2N6, Canada

<sup>5</sup> Centre for Earth Observation Science, University of Manitoba, Winnipeg, MB R3T 2N2, Canada

<sup>6</sup> Centre St-Laurent, Environment and Climate Change Canada, 105 McGill Street, Montreal, QC H2Y 2E7, Canada

<sup>7</sup> Canada Centre for Inland Waters, Environment and Climate Change Canada, 867 Lakeshore Road, Burlington, ON L7S 1A1, Canada

\* Correspondence: tanya.brown@dfo-mpo.gc.ca

## Supplementary Materials

**Table S1.** Metabolite classes, number of metabolites quantified per class ( $n$ ) and geometric mean ( $\pm$  standard deviation) concentrations ( $\mu\text{g/g}$ ) determined in each tissue of male ringed seals ( $n = 9$ ) collected in 2019 in Lake Melville, Labrador, Canada.

| Metabolite classes       | Plasma     |                                   | Liver      |                                      | Inner blubber |                                   | Outer blubber |                                   |
|--------------------------|------------|-----------------------------------|------------|--------------------------------------|---------------|-----------------------------------|---------------|-----------------------------------|
|                          | $n$        | [ ]                               | $n$        | [ ]                                  | $n$           | [ ]                               | $n$           | [ ]                               |
| Acylcarnitines           | 11         | $1.98 \pm 0.56$                   | 29         | $125 \pm 46.3$                       | 6             | $2.75 \pm 1.63$                   | 6             | $3.12 \pm 0.90$                   |
| Amino acids              | 20         | $486 \pm 145$                     | 21         | $2,122 \pm 319$                      | 20            | $101 \pm 51.7$                    | 20            | $149 \pm 43.4$                    |
| Bile acids               | 4          | $0.20 \pm 0.68$                   | 4          | $49.0 \pm 30.4$                      | 0             | -                                 | 0             | -                                 |
| Biogenic amines          | 15         | $53.5 \pm 15.6$                   | 11         | $140 \pm 131$                        | 10            | $103 \pm 47.1$                    | 10            | $120 \pm 20.0$                    |
| Carbohydrates            | 1          | $1,186 \pm 249$                   | 1          | $2,552 \pm 1,615$                    | 1             | $27.3 \pm 33.5$                   | 1             | $44.9 \pm 60.6$                   |
| Energy metabolites       | 6          | $934 \pm 344$                     | 12         | $4,024 \pm 1,030$                    | 6             | $168 \pm 128$                     | 6             | $199 \pm 101$                     |
| Fatty acids              | 10         | $173 \pm 120$                     | 6          | $228 \pm 100$                        | 6             | $308 \pm 562$                     | 6             | $119 \pm 153$                     |
| Lysophosphatidylcholines | 11         | $150 \pm 32.1$                    | 9          | $163 \pm 101$                        | 4             | $9.21 \pm 4.57$                   | 4             | $8.81 \pm 2.56$                   |
| Phosphatidylcholines     | 75         | $530 \pm 143$                     | 75         | $2,054 \pm 305$                      | 68            | $526 \pm 139$                     | 68            | $582 \pm 52.4$                    |
| Sphingolipids            | 14         | $413 \pm 56.2$                    | 14         | $1,227 \pm 85.2$                     | 13            | $193 \pm 59.1$                    | 13            | $226 \pm 51.9$                    |
| <b>Total</b>             | <b>167</b> | <b><math>4,017 \pm 721</math></b> | <b>182</b> | <b><math>13,105 \pm 2,652</math></b> | <b>134</b>    | <b><math>1,588 \pm 802</math></b> | <b>134</b>    | <b><math>1,575 \pm 186</math></b> |

**Table S2.** Metabolite classes, number of metabolites quantified per class (*n*) and geometric mean ( $\pm$  standard deviation) concentrations ( $\mu\text{g/g}$ ) determined in each tissue of male Eastern Beaufort Sea belugas, Northwest Territories, Canada, collected in 2009 (*n* = 4) and 2017 (*n* = 9).

| Metabolite classes       | Plasma <sup>a</sup> |                                   | Liver <sup>b</sup> |                                      | Inner blubber <sup>c</sup> |                                     | Outer blubber <sup>c</sup> |                                     |
|--------------------------|---------------------|-----------------------------------|--------------------|--------------------------------------|----------------------------|-------------------------------------|----------------------------|-------------------------------------|
|                          | <i>n</i>            | [ ]                               | <i>n</i>           | [ ]                                  | <i>n</i>                   | [ ]                                 | <i>n</i>                   | [ ]                                 |
| Acylcarnitines           | 16                  | 2.05 $\pm$ 1.23                   | 17                 | 26.3 $\pm$ 1.61                      | 10                         | 11.0 $\pm$ 6.78                     | 10                         | 14.8 $\pm$ 6.48                     |
| Amino acids              | 18                  | 632 $\pm$ 123                     | 21                 | 3,664 $\pm$ 641                      | 21                         | 269 $\pm$ 642                       | 21                         | 264 $\pm$ 509                       |
| Bile acids               | 3                   | 0.25 $\pm$ 0.42                   | 2                  | 37.3 $\pm$ 22.4                      | 0                          | -                                   | 0                          | -                                   |
| Biogenic amines          | 16                  | 98.3 $\pm$ 38.3                   | 16                 | 1,643 $\pm$ 133                      | 13                         | 193 $\pm$ 186                       | 13                         | 199 $\pm$ 163                       |
| Carbohydrates            | 1                   | 1,100 $\pm$ 616                   | 1                  | 13,345 $\pm$ 1,607                   | 1                          | 254 $\pm$ 795                       | 1                          | 228 $\pm$ 1,127                     |
| Energy metabolites       | 6                   | 105 $\pm$ 67.3                    | 11                 | 4,515 $\pm$ 355                      | 4                          | 468 $\pm$ 898                       | 4                          | 416 $\pm$ 764                       |
| Fatty acids              | 7                   | 15.3 $\pm$ 35.8                   | 11                 | 4,307 $\pm$ 815                      | 8                          | 399 $\pm$ 458                       | 8                          | 216 $\pm$ 391                       |
| Lysophosphatidylcholines | 9                   | 77.0 $\pm$ 41.5                   | 12                 | 438 $\pm$ 33.8                       | 5                          | 12.9 $\pm$ 13.9                     | 5                          | 8.49 $\pm$ 9.94                     |
| Phosphatidylcholines     | 73                  | 324 $\pm$ 96.3                    | 75                 | 3,101 $\pm$ 280                      | 72                         | 562 $\pm$ 259                       | 72                         | 595 $\pm$ 309                       |
| Sphingomyelins           | 14                  | 166 $\pm$ 70.6                    | 14                 | 1,327 $\pm$ 146                      | 12                         | 236 $\pm$ 165                       | 12                         | 232 $\pm$ 162                       |
| <b>Total</b>             | <b>163</b>          | <b>2,657 <math>\pm</math> 832</b> | <b>180</b>         | <b>32,525 <math>\pm</math> 1,261</b> | <b>146</b>                 | <b>2,963 <math>\pm</math> 2,647</b> | <b>146</b>                 | <b>2,509 <math>\pm</math> 2,805</b> |

<sup>a</sup> Mean and SD of the belugas sampled in 2017 (*n* = 9) and 2009 (*n* = 2 instead of 4 as 2009-HI-09 and 2009-HI-10 belugas were outliers).

<sup>b</sup> Mean and SD of the belugas sampled in 2009 (*n* = 4).

<sup>c</sup> Mean and SD of the belugas sampled in 2017 (*n* = 9).

**Table S3.** Correlations between explanatory variables and metabolites that were correlated with a dimension of PCAs made for each tissue (see Figure 3) in ringed seals from Lake Melville. Correlations presented in this table were significant but did not pass the FDR adjustment, and thus were not considered significant based on our criteria. The full name of each metabolite can be found in Table S5.

| Explanatory variable         | Class                   | Metabolite     | Tissue        | Correlation coefficient | <i>p</i> -value |
|------------------------------|-------------------------|----------------|---------------|-------------------------|-----------------|
| Muscle $\delta^{13}\text{C}$ | Phosphatidylcholine     | PC aa C32:3    | Plasma        | -0.67                   | 0.050           |
|                              | Phosphatidylcholine     | PC aa C36:1    | Plasma        | -0.75                   | 0.019           |
|                              | Phosphatidylcholine     | PC aa C38:1    | Plasma        | -0.79                   | 0.011           |
|                              | Phosphatidylcholine     | PC aa C38:6    | Plasma        | -0.74                   | 0.022           |
|                              | Phosphatidylcholine     | PC aa C40:1    | Plasma        | -0.79                   | 0.012           |
|                              | Phosphatidylcholine     | PC aa C40:2    | Plasma        | -0.78                   | 0.012           |
|                              | Phosphatidylcholine     | PC aa C42:2    | Plasma        | -0.72                   | 0.028           |
|                              | Phosphatidylcholine     | PC aa C42:5    | Plasma        | -0.74                   | 0.023           |
|                              | Phosphatidylcholine     | PC aa C42:6    | Plasma        | -0.69                   | 0.040           |
|                              | Phosphatidylcholine     | PC aa C48:0    | Plasma        | -0.69                   | 0.040           |
|                              | Phosphatidylcholine     | PC ae C34:1    | Plasma        | -0.71                   | 0.031           |
|                              | Phosphatidylcholine     | PC ae C36:3    | Plasma        | -0.77                   | 0.014           |
|                              | Phosphatidylcholine     | PC ae C38:2    | Plasma        | -0.69                   | 0.042           |
|                              | Phosphatidylcholine     | PC ae C40:2    | Plasma        | -0.76                   | 0.017           |
| Girth                        | Phosphatidylcholine     | PC ae C36:5    | Liver         | -0.85                   | 0.004           |
|                              | Sphingomyelin           | SM C22:3       | Liver         | -0.94                   | < 0.001         |
| HBB concentration            | Fatty acid              | FA C22:5n3c1   | Inner blubber | 0.68                    | 0.045           |
|                              | Fatty acid              | FA C22:5n3c2   | Inner blubber | 0.68                    | 0.043           |
|                              | Phosphatidylcholine     | PC aa C34:3    | Inner blubber | -0.64                   | 0.046           |
|                              | Phosphatidylcholine     | PC ae C34:0    | Inner blubber | -0.71                   | 0.033           |
|                              | Sphingomyelin           | SM C18:1       | Inner blubber | -0.68                   | 0.044           |
|                              | Acylcarnitine           | AC C5          | Outer blubber | 0.67                    | 0.047           |
|                              | Biogenic amine          | Carnosine      | Outer blubber | 0.81*                   | 0.008           |
|                              | Carbohydrate            | Hex            | Outer blubber | -0.70                   | 0.036           |
|                              | Lysophosphatidylcholine | lysoPC a C18:1 | Outer blubber | -0.75*                  | 0.019           |
|                              | Phosphatidylcholine     | PC aa C34:1    | Outer blubber | -0.83                   | 0.006           |
|                              | Phosphatidylcholine     | PC aa C36:3    | Outer blubber | -0.80                   | 0.010           |
|                              | Phosphatidylcholine     | PC ae C34:1    | Outer blubber | -0.67                   | 0.047           |
|                              | Phosphatidylcholine     | PC ae C34:3    | Outer blubber | -0.69                   | 0.040           |
|                              | Phosphatidylcholine     | PC ae C36:3    | Outer blubber | -0.84                   | 0.005           |
| Hg concentration             | Phosphatidylcholine     | PC ae C36:5    | Liver         | -0.85                   | 0.004           |
|                              | Sphingomyelin           | SM C22:3       | Liver         | -0.76                   | 0.017           |

\* Correlation was evaluated using the Spearman coefficient as the metabolite percent contribution was not normal.

**Table S4.** Correlations between explanatory variables and metabolites that were correlated with a dimension of PCAs made for each tissue (see Figure 3) in Eastern Beaufort Sea belugas. Correlations presented in this table were significant but did not pass the FDR adjustment, and thus were not considered significant based on our criteria. The full name of each metabolite can be found in Table S5.

| Explanatory variable        | Class               | Metabolite   | Tissue        | Correlation coefficient | p-value |
|-----------------------------|---------------------|--------------|---------------|-------------------------|---------|
| Liver $\delta^{13}\text{C}$ | Acylcarnitine       | AC C12       | Plasma        | 0.73                    | 0.011   |
|                             | Amino acid          | Asn          | Plasma        | -0.65                   | 0.029   |
|                             | Fatty acid          | FA C20:5     | Plasma        | 0.75                    | 0.008   |
|                             | Fatty acid          | FA C22:5n3c1 | Plasma        | 0.64                    | 0.033   |
|                             | Fatty acid          | FA C22:5n3c2 | Plasma        | 0.76                    | 0.007   |
|                             | Fatty acid          | FA C22:5n6c  | Plasma        | 0.70                    | 0.017   |
|                             | Fatty acid          | FA C22:6     | Plasma        | 0.81                    | 0.002   |
|                             | Biogenic amine      | Met SO       | Plasma        | -0.69                   | 0.020   |
|                             | Phosphatidylcholine | PC aa C30:0  | Plasma        | 0.64                    | 0.034   |
|                             | Phosphatidylcholine | PC aa C30:2  | Plasma        | -0.81                   | 0.002   |
|                             | Phosphatidylcholine | PC aa C32:1  | Plasma        | -0.78                   | 0.005   |
|                             | Phosphatidylcholine | PC aa C32:2  | Plasma        | -0.85                   | 0.001   |
|                             | Phosphatidylcholine | PC aa C32:3  | Plasma        | -0.70                   | 0.017   |
|                             | Phosphatidylcholine | PC aa C34:1  | Plasma        | -0.65                   | 0.032   |
|                             | Phosphatidylcholine | PC aa C34:2  | Plasma        | -0.77                   | 0.005   |
|                             | Phosphatidylcholine | PC aa C34:3  | Plasma        | -0.79                   | 0.004   |
|                             | Phosphatidylcholine | PC aa C36:1  | Plasma        | -0.62                   | 0.040   |
|                             | Phosphatidylcholine | PC aa C36:2  | Plasma        | -0.70                   | 0.016   |
|                             | Phosphatidylcholine | PC aa C36:3  | Plasma        | -0.66                   | 0.026   |
|                             | Phosphatidylcholine | PC aa C36:6  | Plasma        | -0.65                   | 0.031   |
|                             | Phosphatidylcholine | PC aa C38:3  | Plasma        | -0.63                   | 0.039   |
|                             | Phosphatidylcholine | PC ae C32:1  | Plasma        | -0.68                   | 0.021   |
|                             | Phosphatidylcholine | PC ae C34:1  | Plasma        | -0.69                   | 0.019   |
|                             | Phosphatidylcholine | PC ae C34:3  | Plasma        | -0.70                   | 0.016   |
|                             | Phosphatidylcholine | PC ae C36:5  | Plasma        | -0.70                   | 0.016   |
|                             | Phosphatidylcholine | PC ae C38:5  | Plasma        | -0.65                   | 0.029   |
|                             | Phosphatidylcholine | PC ae C44:3  | Plasma        | -0.63                   | 0.037   |
|                             | Biogenic amine      | Putrescine   | Plasma        | -0.64                   | 0.034   |
|                             | Sphingomyelin       | SM C18:0     | Plasma        | 0.63                    | 0.040   |
|                             | Phosphatidylcholine | PC aa C34:4  | Inner blubber | -0.67                   | 0.049   |
|                             | Sphingomyelin       | SM C24:1     | Inner blubber | -0.76                   | 0.017   |
| Girth                       | Amino acid          | Asp          | Plasma        | -0.65                   | 0.031   |
| Hg concentration            | Acylcarnitine       | AC C18:1     | Outer blubber | -0.70                   | 0.037   |
|                             | Amino acid          | Asp          | Outer blubber | -0.70                   | 0.035   |
|                             | Biogenic amine      | Carnosine    | Outer blubber | -0.72                   | 0.030   |
|                             | Amino acid          | Met          | Outer blubber | -0.67                   | 0.049   |
|                             | Phosphatidylcholine | PC aa C36:6  | Outer blubber | -0.77                   | 0.014   |
|                             | Phosphatidylcholine | PC aa C38:5  | Outer blubber | -0.68                   | 0.043   |
|                             | Phosphatidylcholine | PC aa C38:6  | Outer blubber | -0.78                   | 0.014   |
|                             | Phosphatidylcholine | PC aa C40:2  | Outer blubber | -0.72                   | 0.028   |

|                    |                         |                |               |       |       |
|--------------------|-------------------------|----------------|---------------|-------|-------|
|                    | Phosphatidylcholine     | PC aa C40:5    | Outer blubber | -0.77 | 0.015 |
|                    | Phosphatidylcholine     | PC aa C40:6    | Outer blubber | -0.76 | 0.018 |
|                    | Phosphatidylcholine     | PC aa C42:2    | Outer blubber | -0.67 | 0.049 |
|                    | Phosphatidylcholine     | PC aa C42:6    | Outer blubber | -0.85 | 0.004 |
|                    | Phosphatidylcholine     | PC ae C34:0    | Outer blubber | -0.89 | 0.001 |
|                    | Phosphatidylcholine     | PC ae C36:0    | Outer blubber | -0.77 | 0.014 |
|                    | Phosphatidylcholine     | PC ae C36:5    | Outer blubber | -0.68 | 0.045 |
|                    | Phosphatidylcholine     | PC ae C38:0    | Outer blubber | -0.77 | 0.015 |
|                    | Phosphatidylcholine     | PC ae C38:2    | Outer blubber | -0.67 | 0.049 |
|                    | Phosphatidylcholine     | PC ae C38:5    | Outer blubber | -0.74 | 0.021 |
|                    | Phosphatidylcholine     | PC ae C38:6    | Outer blubber | -0.70 | 0.037 |
|                    | Phosphatidylcholine     | PC ae C40:5    | Outer blubber | -0.73 | 0.025 |
|                    | Phosphatidylcholine     | PC ae C40:6    | Outer blubber | -0.69 | 0.039 |
|                    | Phosphatidylcholine     | PC ae C42:5    | Outer blubber | -0.68 | 0.042 |
|                    | Sphingomyelin           | SM (OH) C14:1  | Outer blubber | -0.79 | 0.012 |
|                    | Sphingomyelin           | SM C16:0       | Outer blubber | -0.83 | 0.006 |
|                    | Sphingomyelin           | SM C16:1       | Outer blubber | -0.68 | 0.046 |
|                    | Sphingomyelin           | SM C18:1       | Outer blubber | -0.68 | 0.046 |
|                    | Amino acid              | Thr            | Outer blubber | -0.77 | 0.016 |
| Length             | Acylcarnitine           | AC C14:1       | Inner blubber | 0.83  | 0.006 |
|                    | Acylcarnitine           | AC C18:2       | Inner blubber | 0.68  | 0.043 |
|                    | Phosphatidylcholine     | PC aa C36:0    | Inner blubber | 0.70  | 0.034 |
| PBDE concentration | Biogenic amine          | GABA           | Plasma        | 0.75* | 0.010 |
|                    | Amino acid              | Glu            | Plasma        | 0.70  | 0.016 |
|                    | Lysophosphatidylcholine | lysoPC a C16:1 | Plasma        | -0.66 | 0.028 |
|                    | Amino acid              | Ala            | Outer blubber | -0.74 | 0.023 |
|                    | Fatty acid              | FA C20:2       | Outer blubber | 0.76  | 0.018 |
|                    | Amino acid              | Gln            | Outer blubber | -0.67 | 0.047 |
|                    | Phosphatidylcholine     | PC aa C38:0    | Outer blubber | -0.79 | 0.011 |

\* Correlation was evaluated using the Spearman coefficient as the metabolite percent contribution was not normal.

**Table S5.** List of metabolites analyzed in plasma, liver and blubber of ringed seal and beluga samples, with corresponding abbreviations and identification numbers from the human metabolome database (HMDB).

| Target                                           | Abbreviation       | HMDB ID      |
|--------------------------------------------------|--------------------|--------------|
| <i>Acylcarnitines</i>                            |                    |              |
| D-Carnitine                                      | AC C0              | HMDB0000062  |
| Acetylcarnitine                                  | AC C2              | HMDB0000201  |
| Propionylcarnitine                               | AC C3              | HMDB0000824  |
| Hydroxypropionylcarnitine                        | AC C3-OH           | HMDB0013125  |
| Propenoylcarnitine                               | AC C3:1            | HMDB0013124  |
| Butyrylcarnitine                                 | AC C4              | HMDB00002013 |
| Hydroxybutyrylcarnitine                          | AC C4-OH (C3-DC)   | HMDB0013127  |
| Butenylcarnitine                                 | AC C4:1            | HMDB0013126  |
| Valerylcarnitine                                 | AC C5              | HMDB0013128  |
| Glutaryl carnitine (Hydroxyhexanoylcarnitine)    | AC C5-DC (C6-OH)   | HMDB0061633  |
| Methylglutaryl carnitine                         | AC C5-M-DC         | HMDB0000552  |
| Hydroxyvalerylcarnitine (Methylmalonylcarnitine) | AC C5-OH (C3-DC-M) | HMDB0013133  |
| Tiglylcarnitine                                  | AC C5:1            | HMDB00002366 |
| Glutaconylcarnitine                              | AC C5:1-DC         | HMDB0013129  |
| Hexanoylcarnitine (Fumaryl carnitine)            | AC C6 (C4:1-DC)    | HMDB00000756 |
| Hexenoylcarnitine                                | AC C6:1            | HMDB0013161  |
| Pimelylcarnitine                                 | AC C7-DC           | HMDB0013328  |
| Octanoylcarnitine                                | AC C8              | HMDB00000791 |
| Nonaylcarnitine                                  | AC C9              | HMDB0013288  |
| Decanoylcarnitine                                | AC C10             | HMDB00000651 |
| Decenoylcarnitine                                | AC C10:1           | HMDB0013205  |
| Decadienylcarnitine                              | AC C10:2           | HMDB00006469 |
| Dodecanoylcarnitine                              | AC C12             | HMDB00002250 |
| Dodecanedioylcarnitine                           | AC C12-DC          | HMDB0013327  |
| Dodecenoylcarnitine                              | AC C12:1           | HMDB0013326  |
| Tetradecanoylcarnitine                           | AC C14             | HMDB00005066 |
| Tetradecenoylcarnitine                           | AC C14:1           | HMDB0013329  |
| Hydroxytetradecenoylcarnitine                    | AC C14:1-OH        | HMDB0013330  |
| Tetradecadienylcarnitine                         | AC C14:2           | HMDB0013331  |
| Hydroxytetradecadienylcarnitine                  | AC C14:2-OH        | HMDB0013332  |
| Hexadecanoylcarnitine                            | AC C16             | HMDB00000222 |
| Hydroxyhexadecanoylcarnitine                     | AC C16-OH          | HMDB0013336  |
| Hexadecenoylcarnitine                            | AC C16:1           | HMDB0013207  |
| Hydroxyhexadecenoylcarnitine                     | AC C16:1-OH        | HMDB0013333  |
| Hexadecadienylcarnitine                          | AC C16:2           | HMDB0013334  |
| Hydroxyhexadecadienylcarnitine                   | AC C16:2-OH        | HMDB0013335  |
| Stearoylcarnitine                                | AC C18             | HMDB00000848 |
| Octadecenoylcarnitine                            | AC C18:1           | HMDB00094687 |
| Hydroxyoctadecenoylcarnitine                     | AC C18:1-OH        | HMDB0013339  |
| Octadecadienylcarnitine                          | AC C18:2           | HMDB00006469 |
| <i>Amino acids</i>                               |                    |              |
| Alanine                                          | Ala                | HMDB00000161 |
| Arginine                                         | Arg                | HMDB00000517 |
| Asparagine                                       | Asn                | HMDB00000168 |
| Aspartic acid                                    | Asp                | HMDB00000191 |

|                               |               |             |
|-------------------------------|---------------|-------------|
| Citrulline                    | Cit           | HMDB0000904 |
| Glutamine                     | Gln           | HMDB0000641 |
| Glutamic acid                 | Glu           | HMDB0000148 |
| Glycine                       | Gly           | HMDB0000123 |
| Histidine                     | His           | HMDB0000177 |
| Isoleucine                    | Ile           | HMDB0000172 |
| Leucine                       | Leu           | HMDB0000687 |
| Lysine                        | Lys           | HMDB0000182 |
| Methionine                    | Met           | HMDB0000696 |
| Ornithine                     | Orn           | HMDB0000214 |
| Phenylalanine                 | Phe           | HMDB0000159 |
| Proline                       | Pro           | HMDB0000162 |
| Serine                        | Ser           | HMDB0000187 |
| Threonine                     | Thr           | HMDB0000167 |
| Tryptophan                    | Trp           | HMDB0000929 |
| Tyrosine                      | Tyr           | HMDB0000158 |
| Valine                        | Val           | HMDB0000883 |
| <i><b>Bile acids</b></i>      |               |             |
| Cholic acid                   | CA            | HMDB0000619 |
| Chenodeoxycholic acid         | CDCA          | HMDB0000518 |
| Deoxycholic acid              | DCA           | HMDB0000626 |
| Glycocholic acid              | GCA           | HMDB0000138 |
| Glychenodeoxycholic acid      | GCDCA         | HMDB0000637 |
| Glycodeoxycholic acid         | GDCA          | HMDB0000631 |
| Lithocholic acid              | LCA           | HMDB0000761 |
| Taurocholic acid              | TCA           | HMDB0000036 |
| Taurochenodeoxycholic acid    | TCDCa         | HMDB0000951 |
| Taurodeoxycholic acid         | TDCA          | HMDB0000896 |
| Taurolithocholic acid         | TLCA          | HMDB0000722 |
| Tauroursodeoxycholic acid     | TUDCA         | HMDB0000874 |
| Ursodeoxycholic acid          | UDCA          | HMDB0000946 |
| <i><b>Biogenic amines</b></i> |               |             |
| Acetyl-ornithine              | Ac-Orn        | HMDB0003357 |
| Asymmetric dimethylarginine   | ADMA          | HMDB0001539 |
| $\alpha$ -aminoadipic acid    | $\alpha$ -AAA | HMDB0000510 |
| Carnosine                     | Carnosine     | HMDB0000033 |
| Creatinine                    | Creatinine    | HMDB0000562 |
| Dopa                          | DOPA          | HMDB0000181 |
| Dopamine                      | Dopamine      | HMDB0000073 |
| gamma-Aminobutyric acid       | GABA          | HMDB0000112 |
| Histamine                     | Histamine     | HMDB0000870 |
| Hydroxyproline                | Hyp           | HMDB0000725 |
| Kynurenine                    | Kynurenine    | HMDB0000684 |
| Methionine sulfoxide          | Met-SO        | HMDB0002005 |
| Nitrotyrosine                 | Nitro-Tyr     | HMDB0001904 |
| Phenylethylamine              | PEA           | HMDB0012275 |
| Putrescine                    | Putrescine    | HMDB0001414 |
| Sarcosine                     | Sarcosine     | HMDB0000271 |
| Symmetric dimethylarginine    | SDMA          | HMDB0003334 |
| Serotonin                     | Serotonin     | HMDB0000259 |



|                                             |                   |             |
|---------------------------------------------|-------------------|-------------|
| Spermidine                                  | Spermidine        | HMDB0001257 |
| Spermine                                    | Spermine          | HMDB0001256 |
| Taurine                                     | Taurine           | HMDB0000251 |
| <b><i>Carbohydrates</i></b>                 |                   |             |
| Σhexose                                     | Hex               | HMDB0000122 |
| <b><i>Energy metabolites</i></b>            |                   |             |
| α-ketobutyric acid                          | Ketobutyric acid  | HMDB0000005 |
| α-ketoglutaric acid                         | Ketoglutaric acid | HMDB0000208 |
| cis-Aconitic acid                           | Aconitic acid     | HMDB0000072 |
| Cyclic AMP                                  | cAMP              | HMDB0000058 |
| Dihydroxyacetonephosphate                   | DHAP              | HMDB0001473 |
| Fumaric acid                                | Fumaric acid      | HMDB0000134 |
| Glutathione (reduced)                       | GSH               | HMDB0000125 |
| Glutathione disulfide (oxidized)            | GSSG              | HMDB0003337 |
| Glucose 6-phosphate                         | Hexose-phosphate  | HMDB0001401 |
| Lactic acid                                 | Lactic acid       | HMDB0000190 |
| Oxaloacetic acid                            | Oxaloacetic acid  | HMDB0000223 |
| D-Ribulose 5-phosphate                      | Pentose-phosphate | HMDB0000618 |
| Phosphoenolpyruvic acid                     | PEP               | HMDB0000263 |
| Pyruvic acid                                | Pyruvic acid      | HMDB0000243 |
| Succinic acid                               | Succinic acid     | HMDB0000254 |
| D-erythrose-4-phosphate                     | Tetrose-phosphate | HMDB0001321 |
| <b><i>Fatty acids</i></b>                   |                   |             |
| Capric acid                                 | FA C10:0          | HMDB0000511 |
| Myristic acid                               | FA C14:0          | HMDB0000806 |
| Palmitic acid                               | FA C16:0          | HMDB0000220 |
| Palmitoleic acid                            | FA C16:1ω7        | HMDB0003229 |
| Stearic acid                                | FA C18:0          | HMDB0000827 |
| Oleic acid                                  | FA C18:1ω9        | HMDB0000207 |
| Linoleic acid                               | FA C18:2ω6        | HMDB0000673 |
| Linolenic acid                              | FA C18:3ω3        | HMDB0001388 |
| Eicosadienoic acid                          | FA C20:2ω6        | HMDB0005060 |
| Eicosatrienoic acid                         | FA C20:3ω3        | HMDB0010378 |
| Dihomo-γ-linolenic acid                     | FA C20:3ω6        | HMDB0002925 |
| Arachidonic acid                            | FA C20:4ω6        | HMDB0001043 |
| Eicosapentaenoic acid                       | FA C20:5ω3        | HMDB0001999 |
| Adrenic acid                                | FA C22:4ω6        | HMDB0002226 |
| all-cis-4,8,12,15,19-docosapentaenoic acid  | FA C22:5ω3c1      | HMDB0039133 |
| all-cis-7,10,13,16,19-docosapentaenoic acid | FA C22:5ω3c2      | HMDB0006528 |
| all-cis-4,7,10,13,16-docosapentaenoic acid  | FA C22:5ω6        | HMDB0001976 |
| Docosahexaenoic acid                        | FA C22:6ω3        | HMDB0002183 |
| <b><i>Lysophosphatidylcholines</i></b>      |                   |             |
| Lysophosphatidylcholine acyl C14:0          | lysoPC a C14:0    | HMDB0010379 |
| Lysophosphatidylcholine acyl C16:0          | lysoPC a C16:0    | HMDB0010382 |
| Lysophosphatidylcholine acyl C16:1          | lysoPC a C16:1    | HMDB0010383 |
| Lysophosphatidylcholine acyl C17:0          | lysoPC a C17:0    | HMDB0012108 |
| Lysophosphatidylcholine acyl C18:0          | lysoPC a C18:0    | HMDB0010384 |
| Lysophosphatidylcholine acyl C18:1          | lysoPC a C18:1    | HMDB0002815 |

|                                    |                |             |
|------------------------------------|----------------|-------------|
| Lysophosphatidylcholine acyl C18:2 | lysoPC a C18:2 | HMDB0010386 |
| Lysophosphatidylcholine acyl C20:3 | lysoPC a C20:3 | HMDB0010393 |
| Lysophosphatidylcholine acyl C20:4 | lysoPC a C20:4 | HMDB0010396 |
| Lysophosphatidylcholine acyl C24:0 | lysoPC a C24:0 | HMDB0010405 |
| Lysophosphatidylcholine acyl C26:1 | lysoPC a C26:1 | HMDB0029220 |
| Lysophosphatidylcholine acyl C28:0 | lysoPC a C28:0 | HMDB0029206 |
| Lysophosphatidylcholine acyl C28:1 | lysoPC a C28:1 | HMDB0029221 |

### *Phosphatidylcholines*

|                                      |             |             |
|--------------------------------------|-------------|-------------|
| Phosphatidylcholine diacyl C24:0     | PC aa C24:0 | -           |
| Phosphatidylcholine diacyl C26:0     | PC aa C26:0 | -           |
| Phosphatidylcholine diacyl C28:1     | PC aa C28:1 | HMDB0007867 |
| Phosphatidylcholine diacyl C30:0     | PC aa C30:0 | HMDB0007934 |
| Phosphatidylcholine diacyl C30:2     | PC aa C30:2 | HMDB0007903 |
| Phosphatidylcholine diacyl C32:0     | PC aa C32:0 | HMDB0000564 |
| Phosphatidylcholine diacyl C32:1     | PC aa C32:1 | HMDB0007904 |
| Phosphatidylcholine diacyl C32:2     | PC aa C32:2 | HMDB0007906 |
| Phosphatidylcholine diacyl C32:3     | PC aa C32:3 | HMDB0008163 |
| Phosphatidylcholine diacyl C34:1     | PC aa C34:1 | HMDB0007911 |
| Phosphatidylcholine diacyl C34:2     | PC aa C34:2 | HMDB0008029 |
| Phosphatidylcholine diacyl C34:3     | PC aa C34:3 | HMDB0008192 |
| Phosphatidylcholine diacyl C34:4     | PC aa C34:4 | HMDB0008232 |
| Phosphatidylcholine diacyl C36:0     | PC aa C36:0 | HMDB0007886 |
| Phosphatidylcholine diacyl C36:1     | PC aa C36:1 | HMDB0007887 |
| Phosphatidylcholine diacyl C36:2     | PC aa C36:2 | HMDB0008070 |
| Phosphatidylcholine diacyl C36:3     | PC aa C36:3 | HMDB0007981 |
| Phosphatidylcholine diacyl C36:4     | PC aa C36:4 | HMDB0007983 |
| Phosphatidylcholine diacyl C36:5     | PC aa C36:5 | HMDB0007984 |
| Phosphatidylcholine diacyl C36:6     | PC aa C36:6 | HMDB0008657 |
| Phosphatidylcholine diacyl C38:0     | PC aa C38:0 | HMDB0007985 |
| Phosphatidylcholine diacyl C38:1     | PC aa C38:1 | HMDB0008269 |
| Phosphatidylcholine diacyl C38:3     | PC aa C38:3 | HMDB0008271 |
| Phosphatidylcholine diacyl C38:4     | PC aa C38:4 | HMDB0008304 |
| Phosphatidylcholine diacyl C38:5     | PC aa C38:5 | HMDB0008522 |
| Phosphatidylcholine diacyl C38:6     | PC aa C38:6 | HMDB0008751 |
| Phosphatidylcholine diacyl C40:1     | PC aa C40:1 | HMDB0008791 |
| Phosphatidylcholine diacyl C40:2     | PC aa C40:2 | HMDB0008564 |
| Phosphatidylcholine diacyl C40:3     | PC aa C40:3 | HMDB0008183 |
| Phosphatidylcholine diacyl C40:4     | PC aa C40:4 | HMDB0008536 |
| Phosphatidylcholine diacyl C40:5     | PC aa C40:5 | HMDB0008599 |
| Phosphatidylcholine diacyl C40:6     | PC aa C40:6 | HMDB0008688 |
| Phosphatidylcholine diacyl C42:0     | PC aa C42:0 | HMDB0008537 |
| Phosphatidylcholine diacyl C42:1     | PC aa C42:1 | HMDB0008538 |
| Phosphatidylcholine diacyl C42:2     | PC aa C42:2 | HMDB0008539 |
| Phosphatidylcholine diacyl C42:4     | PC aa C42:4 | HMDB0008798 |
| Phosphatidylcholine diacyl C42:5     | PC aa C42:5 | HMDB0008606 |
| Phosphatidylcholine diacyl C42:6     | PC aa C42:6 | HMDB0008607 |
| Phosphatidylcholine diacyl C48:0     | PC aa C48:0 | HMDB0008782 |
| Phosphatidylcholine acyl-alkyl C30:0 | PC ae C30:0 | HMDB0013341 |
| Phosphatidylcholine acyl-alkyl C30:1 | PC ae C30:1 | HMDB0013402 |
| Phosphatidylcholine acyl-alkyl C30:2 | PC ae C30:2 | HMDB0013410 |

|                                      |             |             |
|--------------------------------------|-------------|-------------|
| Phosphatidylcholine acyl-alkyl C32:1 | PC ae C32:1 | HMDB0013404 |
| Phosphatidylcholine acyl-alkyl C32:2 | PC ae C32:2 | HMDB0013411 |
| Phosphatidylcholine acyl-alkyl C34:0 | PC ae C34:0 | HMDB0013405 |
| Phosphatidylcholine acyl-alkyl C34:1 | PC ae C34:1 | HMDB0013412 |
| Phosphatidylcholine acyl-alkyl C34:2 | PC ae C34:2 | HMDB0011151 |
| Phosphatidylcholine acyl-alkyl C34:3 | PC ae C34:3 | HMDB0013413 |
| Phosphatidylcholine acyl-alkyl C36:0 | PC ae C36:0 | HMDB0013417 |
| Phosphatidylcholine acyl-alkyl C36:1 | PC ae C36:1 | HMDB0013414 |
| Phosphatidylcholine acyl-alkyl C36:2 | PC ae C36:2 | HMDB0013418 |
| Phosphatidylcholine acyl-alkyl C36:3 | PC ae C36:3 | HMDB0013429 |
| Phosphatidylcholine acyl-alkyl C36:4 | PC ae C36:4 | HMDB0013435 |
| Phosphatidylcholine acyl-alkyl C36:5 | PC ae C36:5 | HMDB0013415 |
| Phosphatidylcholine acyl-alkyl C38:0 | PC ae C38:0 | HMDB0013408 |
| Phosphatidylcholine acyl-alkyl C38:1 | PC ae C38:1 | HMDB0013416 |
| Phosphatidylcholine acyl-alkyl C38:2 | PC ae C38:2 | HMDB0013431 |
| Phosphatidylcholine acyl-alkyl C38:3 | PC ae C38:3 | HMDB0013439 |
| Phosphatidylcholine acyl-alkyl C38:5 | PC ae C38:5 | HMDB0013432 |
| Phosphatidylcholine acyl-alkyl C38:6 | PC ae C38:6 | HMDB0013409 |
| Phosphatidylcholine acyl-alkyl C40:1 | PC ae C40:1 | HMDB0013433 |
| Phosphatidylcholine acyl-alkyl C40:2 | PC ae C40:2 | HMDB0013437 |
| Phosphatidylcholine acyl-alkyl C40:3 | PC ae C40:3 | HMDB0013445 |
| Phosphatidylcholine acyl-alkyl C40:4 | PC ae C40:4 | HMDB0013442 |
| Phosphatidylcholine acyl-alkyl C40:5 | PC ae C40:5 | HMDB0013444 |
| Phosphatidylcholine acyl-alkyl C40:6 | PC ae C40:6 | HMDB0013422 |
| Phosphatidylcholine acyl-alkyl C42:0 | PC ae C42:0 | HMDB0013423 |
| Phosphatidylcholine acyl-alkyl C42:1 | PC ae C42:1 | HMDB0013434 |
| Phosphatidylcholine acyl-alkyl C42:2 | PC ae C42:2 | HMDB0013438 |
| Phosphatidylcholine acyl-alkyl C42:3 | PC ae C42:3 | HMDB0013458 |
| Phosphatidylcholine acyl-alkyl C42:4 | PC ae C42:4 | HMDB0013448 |
| Phosphatidylcholine acyl-alkyl C42:5 | PC ae C42:5 | HMDB0013451 |
| Phosphatidylcholine acyl-alkyl C44:3 | PC ae C44:3 | HMDB0013449 |
| Phosphatidylcholine acyl-alkyl C44:4 | PC ae C44:4 | HMDB0013460 |
| Phosphatidylcholine acyl-alkyl C44:5 | PC ae C44:5 | HMDB0013456 |
| Phosphatidylcholine acyl-alkyl C44:6 | PC ae C44:6 | HMDB0013450 |

### *Sphingolipids*

|                            |               |             |
|----------------------------|---------------|-------------|
| Hydroxysphingomyelin C14:1 | SM (OH) C14:1 | HMDB0013462 |
| Hydroxysphingomyelin C16:1 | SM (OH) C16:1 | HMDB0013463 |
| Hydroxysphingomyelin C22:1 | SM (OH) C22:1 | HMDB0013466 |
| Hydroxysphingomyelin C22:2 | SM (OH) C22:2 | HMDB0013467 |
| Hydroxysphingomyelin C24:1 | SM (OH) C24:1 | HMDB0013469 |
| Sphingomyelin C16:0        | SM C16:0      | HMDB0010169 |
| Sphingomyelin C16:1        | SM C16:1      | HMDB0013464 |
| Sphingomyelin C18:0        | SM C18:0      | HMDB0012087 |
| Sphingomyelin C18:1        | SM C18:1      | HMDB0012101 |
| Sphingomyelin C20:2        | SM C20:2      | HMDB0013465 |
| Sphingomyelin C22:3        | SM C22:3      | HMDB0013468 |
| Sphingomyelin C24:0        | SM C24:0      | HMDB0011697 |
| Sphingomyelin C24:1        | SM C24:1      | HMDB0012107 |
| Sphingomyelin C26:0        | SM C26:0      | HMDB0011698 |
| Sphingomyelin C26:1        | SM C26:1      | HMDB0013461 |

**Table S6.** Percent recoveries of standard reference materials (SRMs) used for metabolomic analyses in blubber, liver and plasma of Eastern Beaufort Sea belugas and ringed seals from Lake Melville. The full name of each metabolite can be found in Table S5.

| Percent recovery of SRMs<br>of belugas (%) |       | Percent recovery of SRMs<br>of ringed seals (%) |       |
|--------------------------------------------|-------|-------------------------------------------------|-------|
| <i>Blubber</i>                             |       |                                                 |       |
| Glu                                        | 142 % | PC aa C36:2                                     | 142 % |
| Ala                                        | 135 % | Succinic acid                                   | 129 % |
| Taurine                                    | 132 % | Sarcosine                                       | 122 % |
| Val                                        | 121 % | SM C16:0                                        | 118 % |
| Gly                                        | 117 % | SM C18:1                                        | 114 % |
| His                                        | 110 % | Val                                             | 103 % |
| Gln                                        | 101 % | Taurine                                         | 102 % |
| lysoPC a C18:2                             | 100 % | FA C22:6                                        | 100 % |
| Carnosine                                  | 97 %  | lysoPC a C18:2                                  | 99 %  |
| GCDCA                                      | 95 %  | AC C0                                           | 98 %  |
| AC C0                                      | 89 %  | TCDCA                                           | 96 %  |
| TCDCA                                      | 89 %  | GCDCA                                           | 96 %  |
| PC ae C34:0                                | 86 %  | UDCA                                            | 94 %  |
| SM C16:0                                   | 77 %  | PC ae C36:2                                     | 92 %  |
| Ac-Orn                                     | 55 %  | lysoPC a C17:0                                  | 91 %  |
|                                            |       | Gln                                             | 89 %  |
|                                            |       | Glu                                             | 89 %  |
|                                            |       | Ala                                             | 87 %  |
|                                            |       | Pro                                             | 84 %  |
|                                            |       | AC C16:2                                        | 80 %  |
|                                            |       | Tetrose-phosphate                               | 79 %  |
|                                            |       | FA C20:4                                        | 77 %  |
|                                            |       | Tyr                                             | 76 %  |
|                                            |       | FA C20:5                                        | 70 %  |
|                                            |       | Asn                                             | 65 %  |
| <i>Liver</i>                               |       |                                                 |       |
| FA C20:5                                   | 149 % | Ac-Orn                                          | 138 % |
| FA C22:6                                   | 142 % | Succinic acid                                   | 126 % |
| FA C20:4                                   | 130 % | PC aa C36:2                                     | 126 % |
| Taurine                                    | 128 % | AC C0                                           | 120 % |
| lysoPC a C18:0                             | 123 % | FA C18:1                                        | 117 % |
| Ala                                        | 107 % | FA C14:0                                        | 112 % |
| AC C0                                      | 105 % | Tetrose-phosphate                               | 109 % |
|                                            |       | Phosphoenolpyruva                               |       |
| GCDCA                                      | 103 % | te                                              | 104 % |
| Glu                                        | 103 % | Carnosine                                       | 101 % |
| TCDCA                                      | 101 % | Ala                                             | 96 %  |
| SM C26:0                                   | 101 % | Glu                                             | 95 %  |
| Gly                                        | 98 %  | SM (OH) C24:1                                   | 93 %  |

|                  |      |                |      |
|------------------|------|----------------|------|
| His              | 96 % | lysoPC a C18:0 | 91 % |
| Gln              | 92 % | Gly            | 89 % |
| Met              | 91 % | GCDCA          | 89 % |
| Ser              | 89 % | TCDCA          | 86 % |
| Hexose-phosphate | 83 % | His            | 84 % |
| PC aa C36:2      | 80 % | Pro            | 83 % |
| Ac-Orn           | 69 % | Gln            | 80 % |
| Succinic acid    | 65 % | Taurine        | 77 % |
|                  |      | Tyr            | 67 % |
|                  |      | FA C20:4       | 64 % |

*Plasma*

|             |       |                     |       |
|-------------|-------|---------------------|-------|
| Ala         | 148 % | FA C20:4            | 119 % |
| Arg         | 148 % | Leu                 | 110 % |
| Phe         | 144 % | PC aa C36:2         | 106 % |
| His         | 144 % | FA C22:6            | 106 % |
| Ser         | 144 % | Ile                 | 103 % |
| PC aa C36:2 | 93 %  | Lys                 | 102 % |
| CDCA        | 91 %  | PC ae C34:1         | 98 %  |
| GCDCA       | 81 %  | Ala                 | 97 %  |
| FA C22:5n6c | 80 %  | Arg                 | 94 %  |
| GDCA        | 78 %  | PC aa C34:2         | 94 %  |
| PC aa C34:2 | 74 %  | Phe                 | 93 %  |
| PC ae C34:1 | 73 %  | Succinic acid       | 92 %  |
| Hex         | 72 %  | His                 | 90 %  |
| Lactic acid | 61 %  | a-ketoglutaric acid | 88 %  |
|             |       | GDCA                | 87 %  |
|             |       | FA C16:1            | 87 %  |
|             |       | Ser                 | 85 %  |
|             |       | CDCA                | 80 %  |
|             |       | Hex                 | 76 %  |
|             |       | GCDCA               | 66 %  |

---

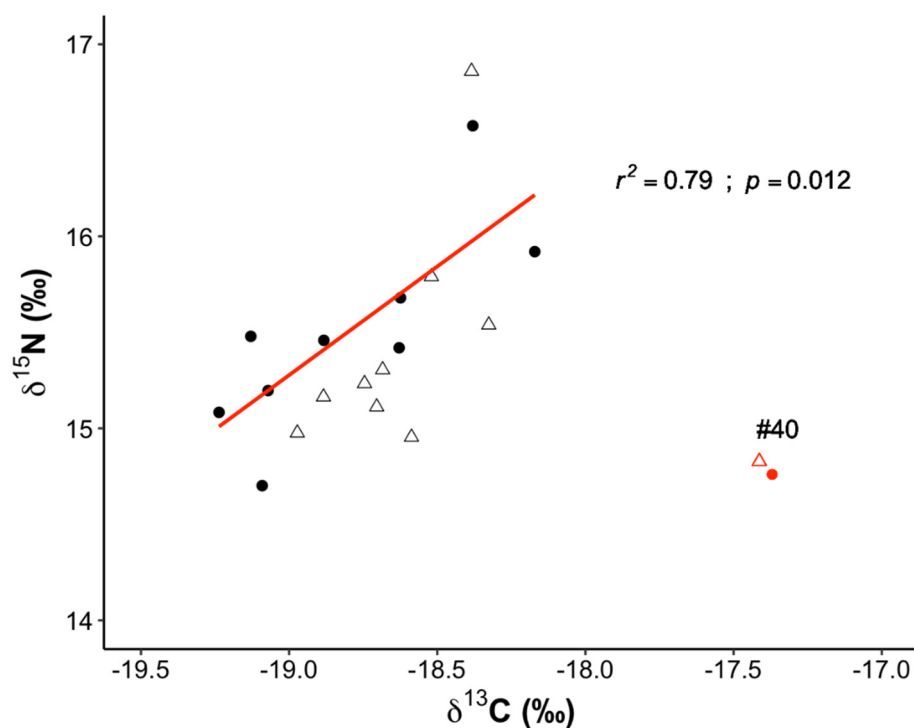

**Figure S1.** Correlation between muscle (●) and liver (△)  $\delta^{15}\text{N}$  and  $\delta^{13}\text{C}$  values (‰) in ringed seals of Lake Melville. Carbon and nitrogen stable isotope ratios were significantly correlated in muscle (red line), but not in liver ( $p = 0.07$ ). Values of  $\delta^{13}\text{C}$  have been determined from lipid-extracted samples. The ringed seal #40 has been added to the graph to better illustrate its outlierness. This individual has not been included in the correlation analysis between  $\delta^{15}\text{N}$  and  $\delta^{13}\text{C}$  values.

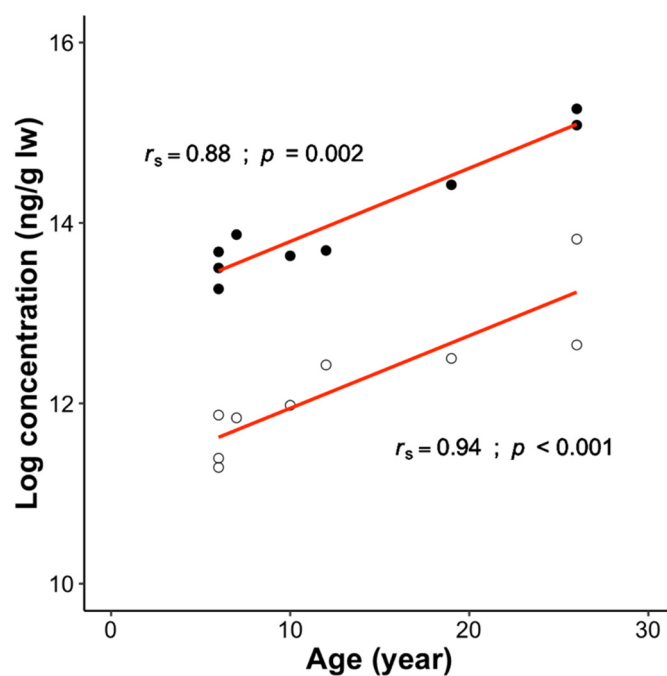

**Figure S2.** Correlation between age of seals and log-transformed  $\Sigma_{124}\text{PCB}$  (●) and  $\Sigma_{24}\text{PBDE}$  (○) blubber concentrations in ringed seal blubber ( $n = 9$ ) from Lake Melville.

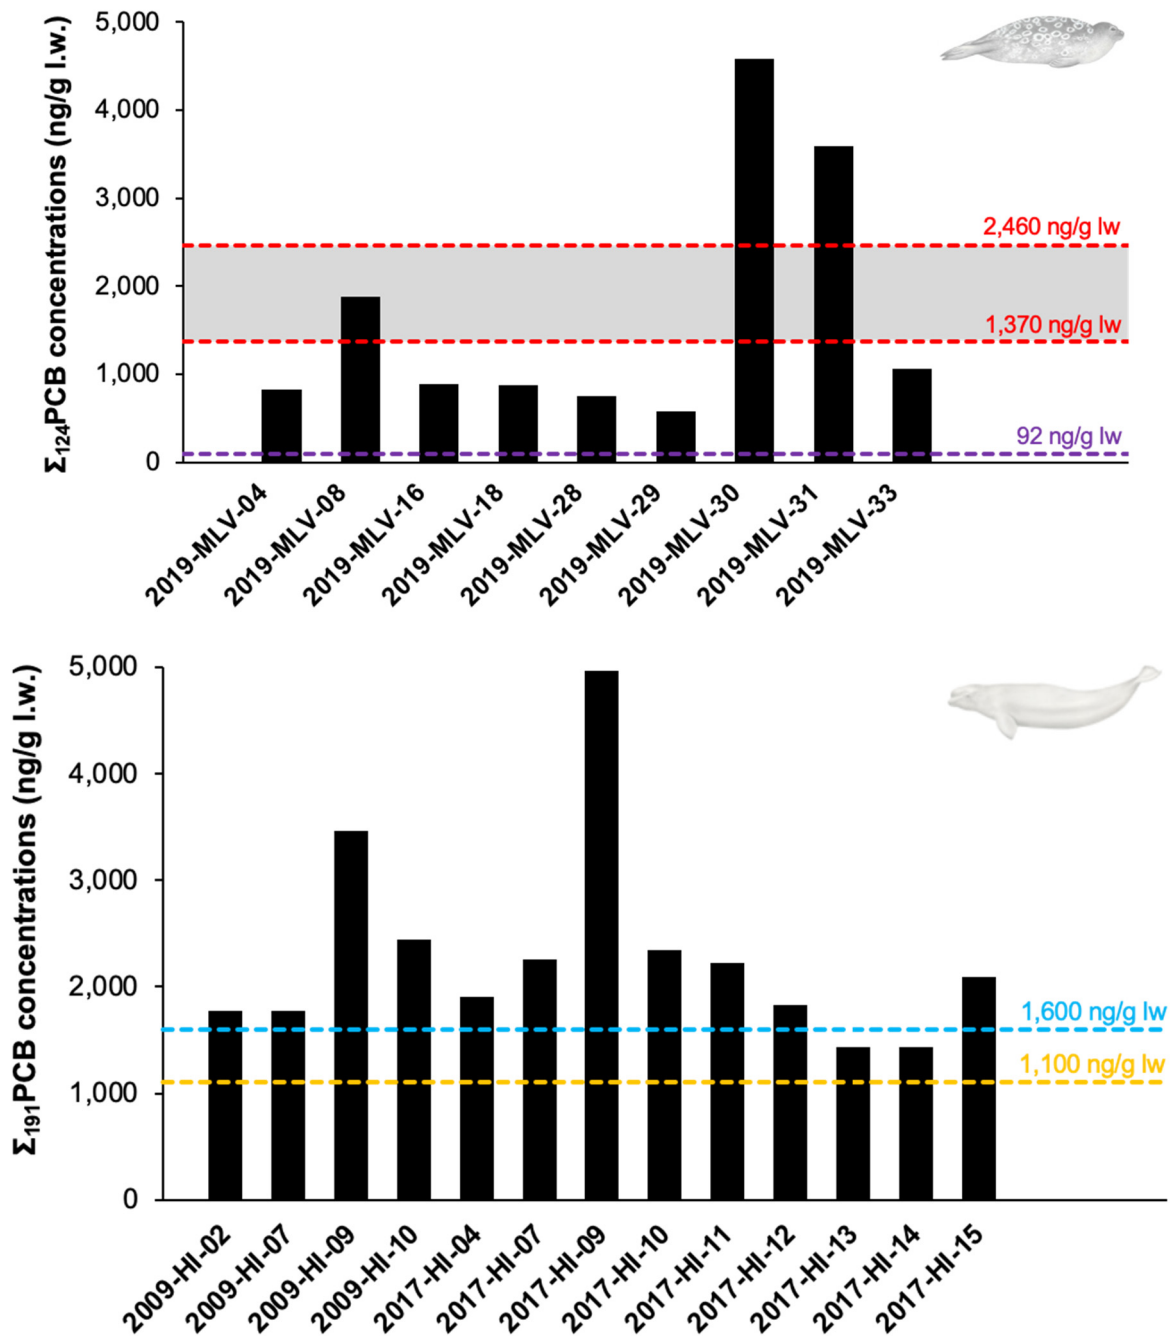

**Figure S3.** Blubber concentrations (ng/g lw) of  $\Sigma$ PCB in ringed seals ( $n = 9$ ) from Lake Melville (top chart) and in belugas ( $n = 13$ ) from Eastern Beaufort Sea (bottom chart). The grey band represents the range of PCB effect thresholds estimated by Brown et al. (2014) for five genes (*Ahr*, *Esr1*, *Igf1*, *Il1b*, and *Nr3c1*) in ringed seal liver. The dashed lines represent effect thresholds of PCBs for the disruption of vitamin A and E profiles in belugas (blue; Desforges et al., 2013), and for phagocytosis in cetaceans (yellow; Desforges et al., 2016), and for lymphocyte proliferation in ringed seals (purple; Desforges et al., 2016).

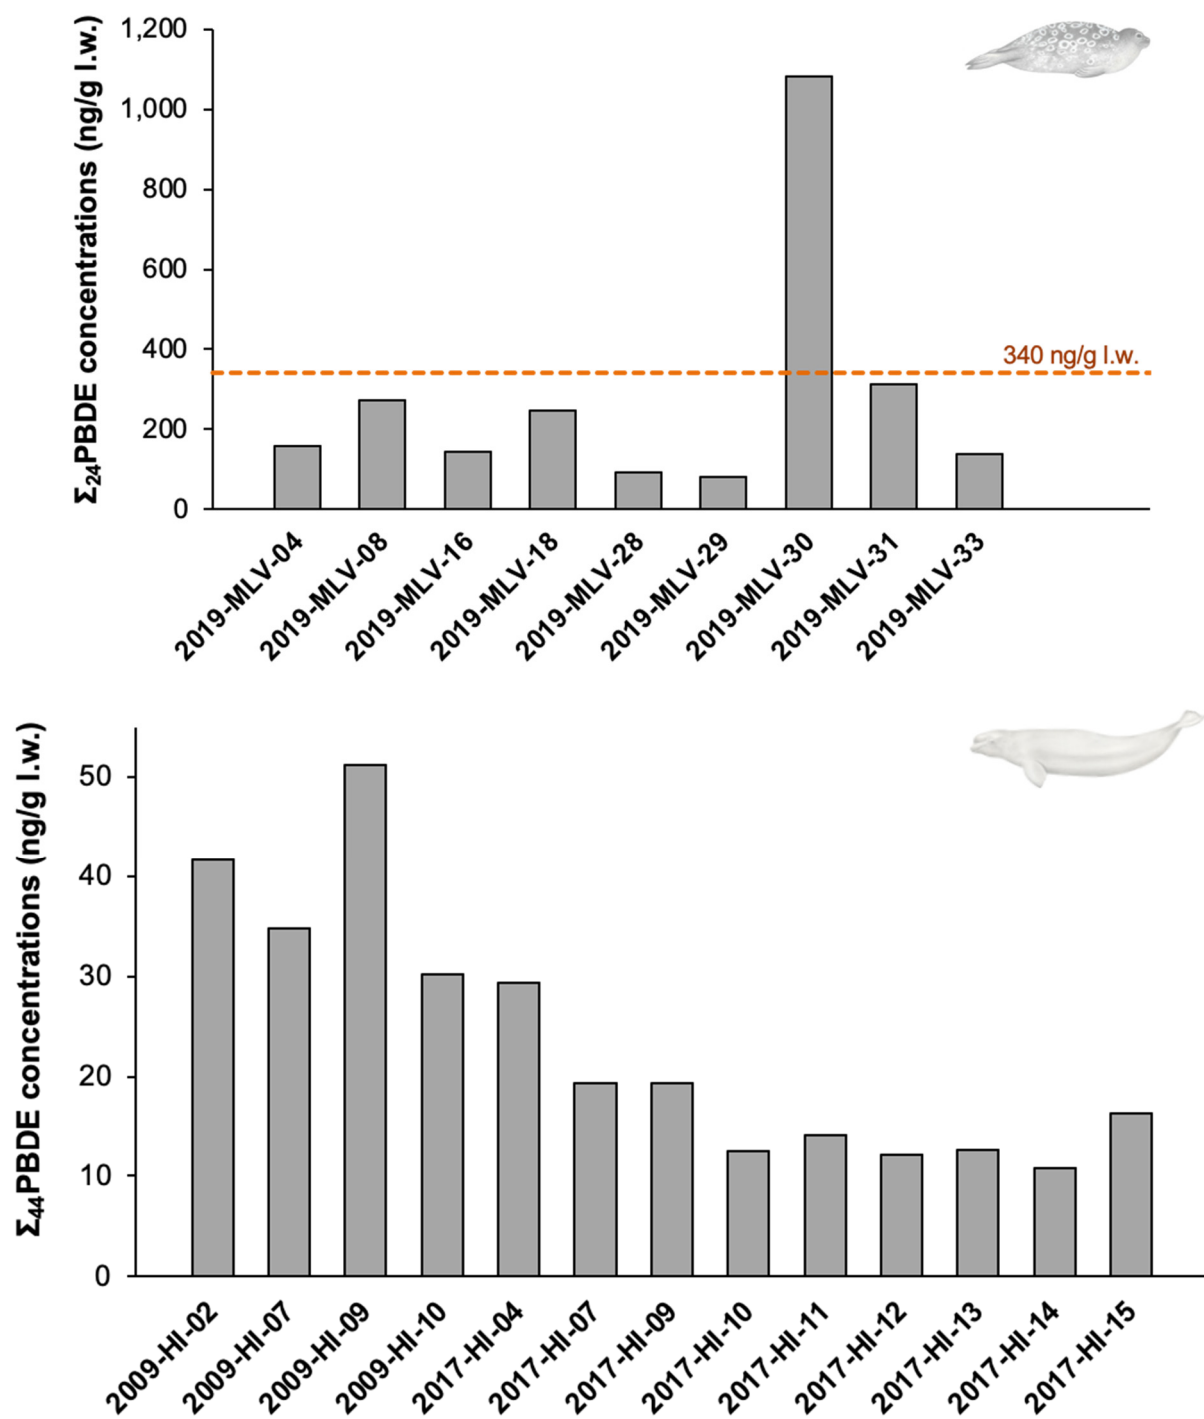

**Figure S4.** Blubber concentrations (ng/g lw) of  $\Sigma$ PBDE in ringed seals ( $n = 9$ ) from Lake Melville (top chart) and in belugas ( $n = 13$ ) from Eastern Beaufort Sea (bottom chart). The orange dashed line represent the effect threshold of PBDEs for phagocytosis in harbor seals (Desforges et al., 2016).



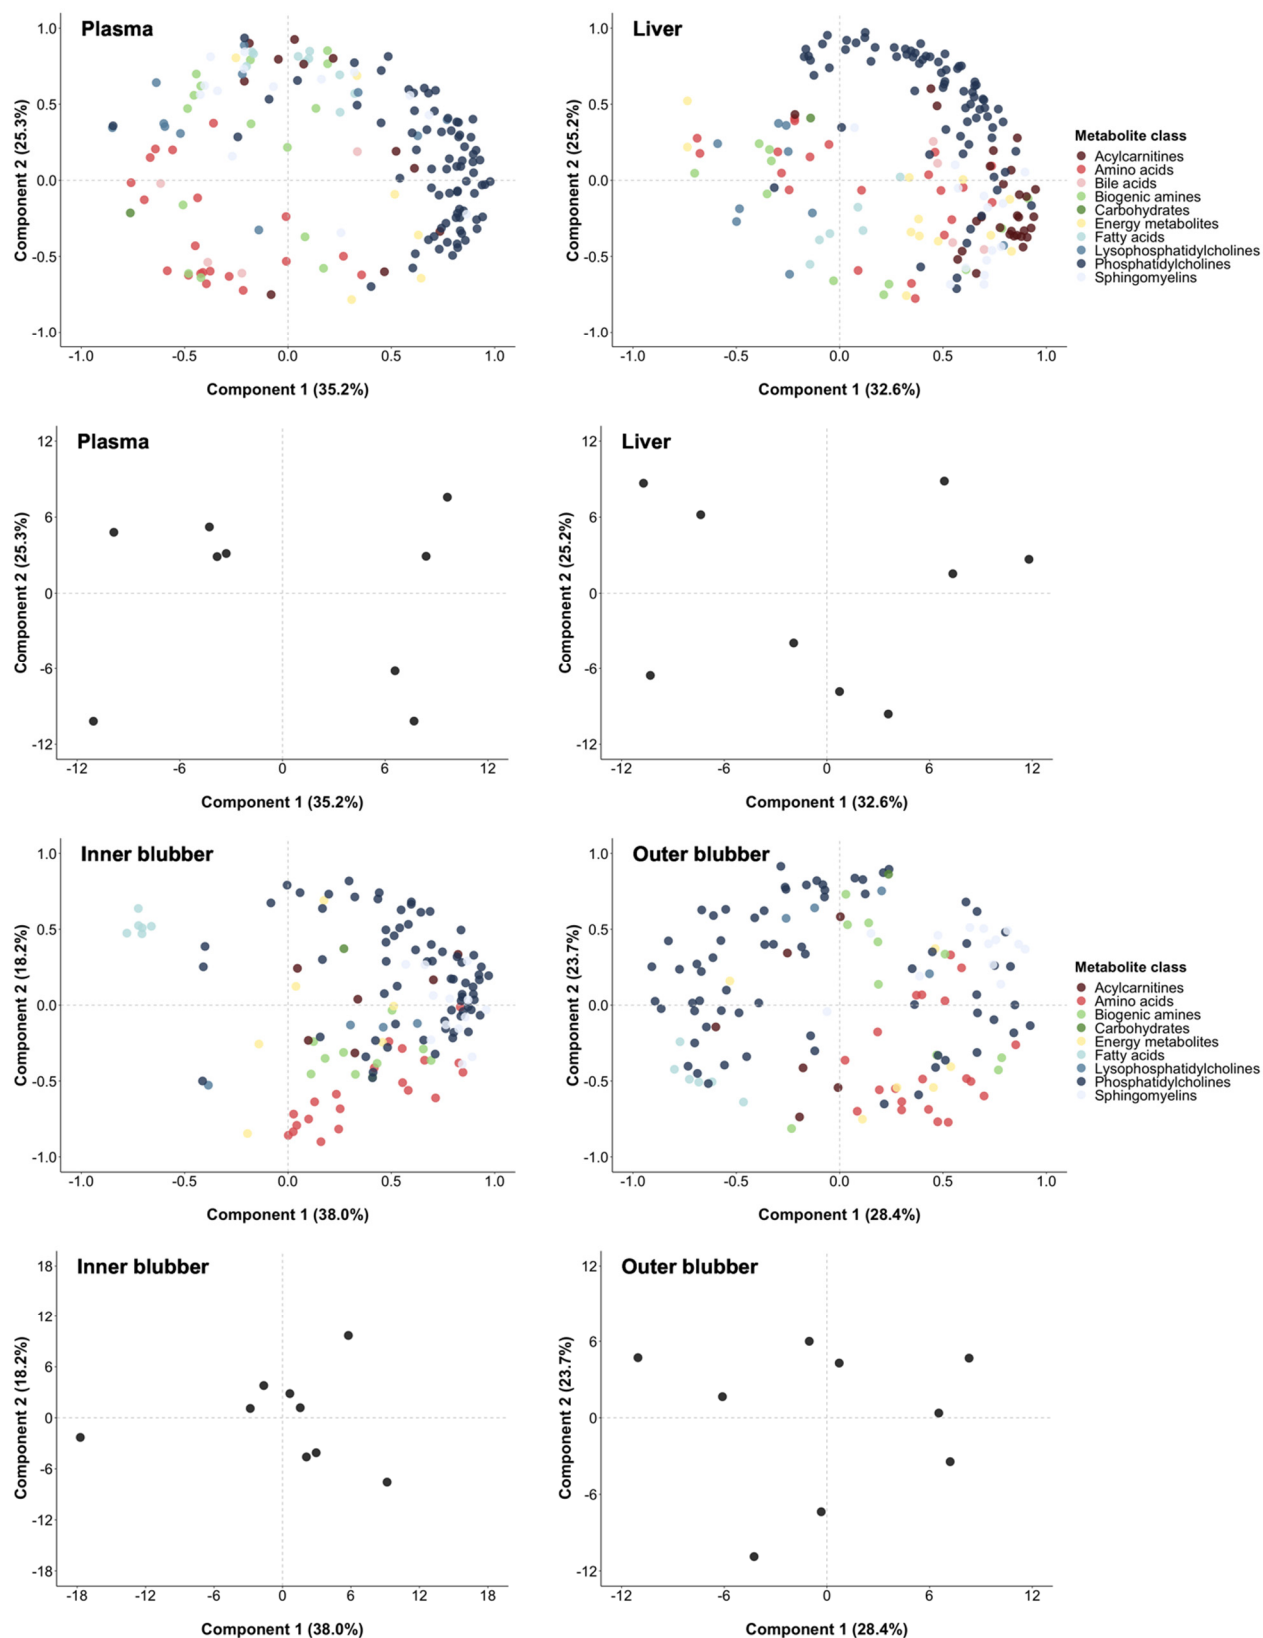

**Figure S5.** Score and loadings plots of PCAs performed with log-transformed percent contributions of metabolites quantified in plasma, liver, inner blubber and outer blubber of ringed seals from Lake Melville. Observations and variables are projected onto components 1 and 2 of PCAs.

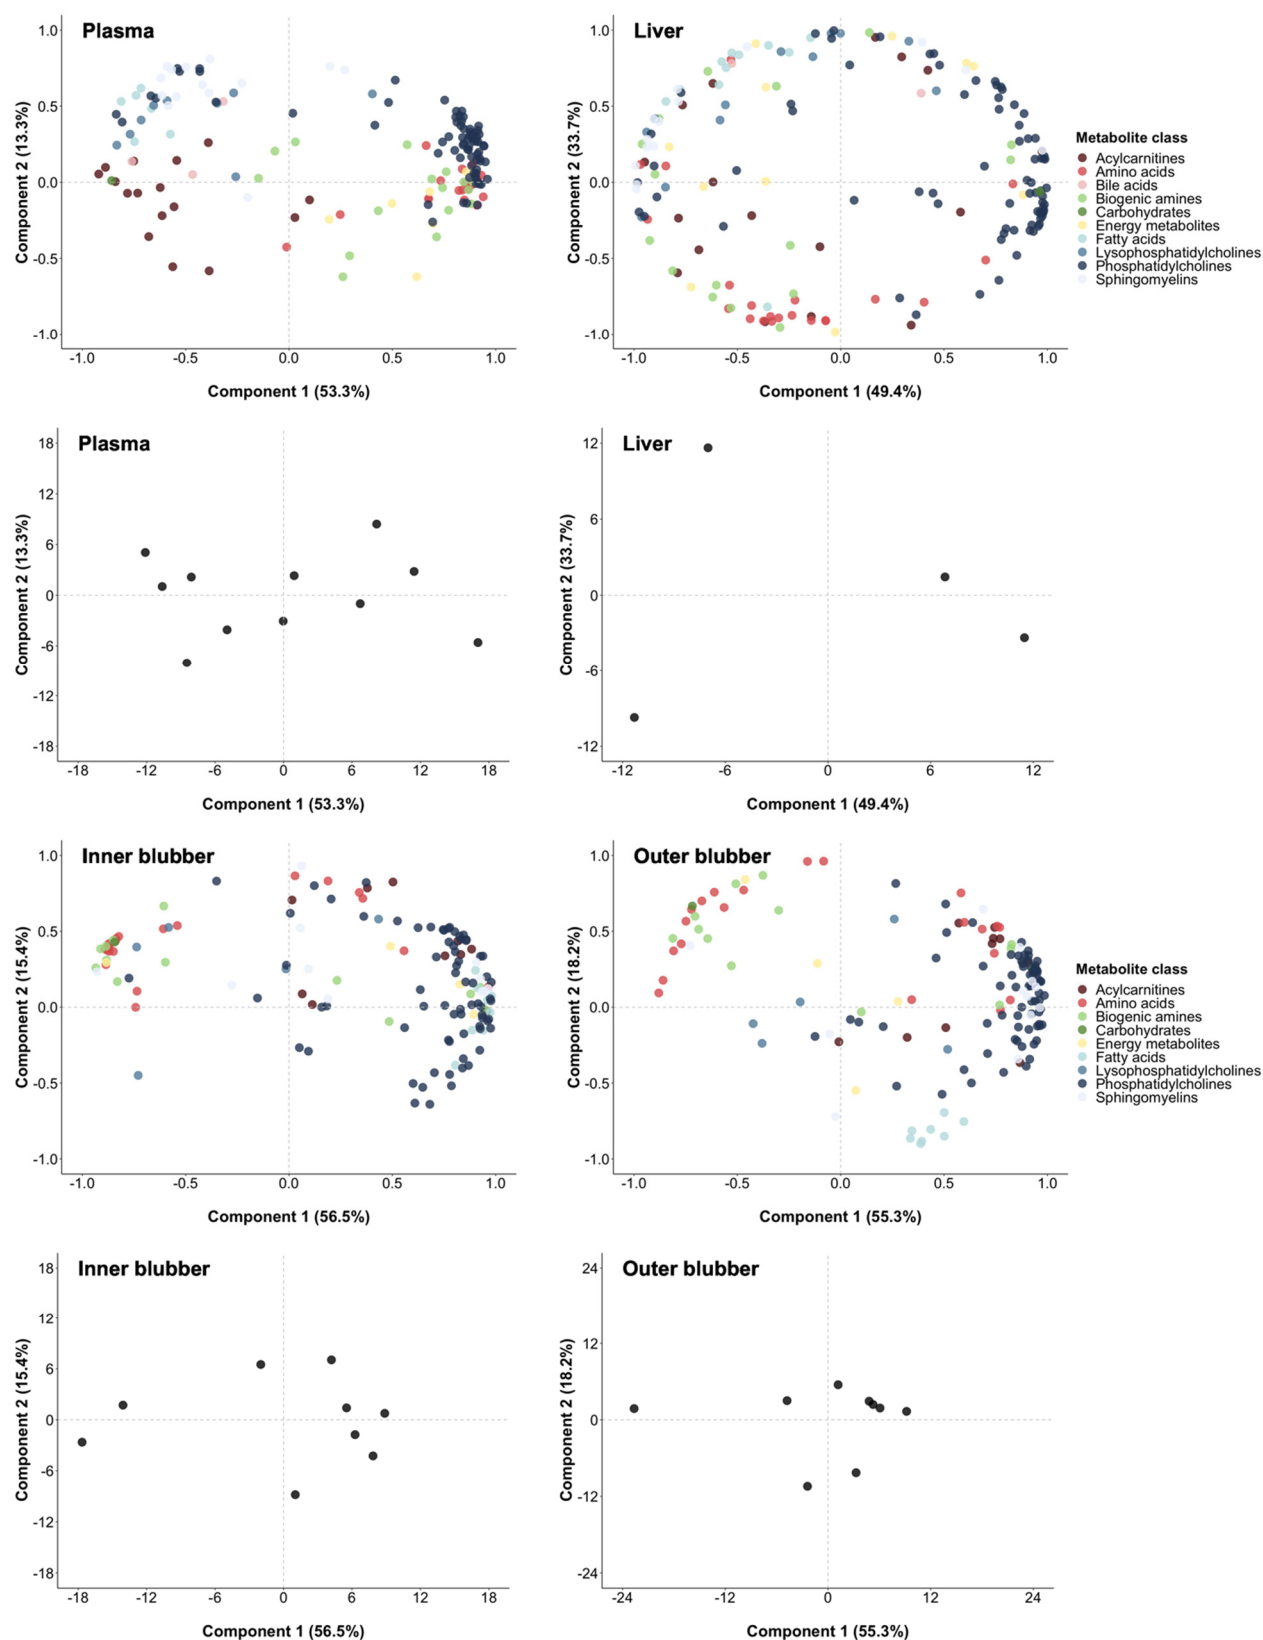

**Figure S6.** Score and loadings plots of PCAs performed with log-transformed percent contributions of metabolites quantified in plasma, liver, inner blubber and outer blubber of Eastern Beaufort Sea belugas. Observations and variables are projected onto components 1 and 2 of PCAs.

## References

1. Brown, T.M., Ross, P.S., Reimer, K.J., Veldhoen, N., Dangerfield, N.J., Fisk, A.T., Helbing, C.C., 2014. PCB related effects thresholds as derived through gene transcript profiles in locally contaminated ringed seals (*Pusa hispida*). *Environ. Sci. Technol.* 48, 12952–12961. <https://doi.org/10.1021/es5032294>
2. Desforges, J.-P.W., Ross, P.S., Dangerfield, N., Palace, V.P., Whitticar, M., Loseto, L.L., 2013. Vitamin A and E profiles as biomarkers of PCB exposure in beluga whales (*Delphinapterus leucas*) from the western Canadian Arctic. *Aquat. Toxicol.* 142–143, 317–328. <https://doi.org/http://dx.doi.org/10.1016/j.aquatox.2013.08.004>
3. Desforges, J.-P.W., Sonne, C., Levin, M., Siebert, U., De Guise, S., Dietz, R., 2016. Immunotoxic effects of environmental pollutants in marine mammals. *Environ. Int.* 86, 126–139. <https://doi.org/http://dx.doi.org/10.1016/j.envint.2015.10.007>
